# Supplementary material
Source: Springer Nature journal article supplement (https://www.springermedizin.de/resource/supplementary/12937_2013_754_MOESM3_ESM.docx/25653972)

**Figure 3**


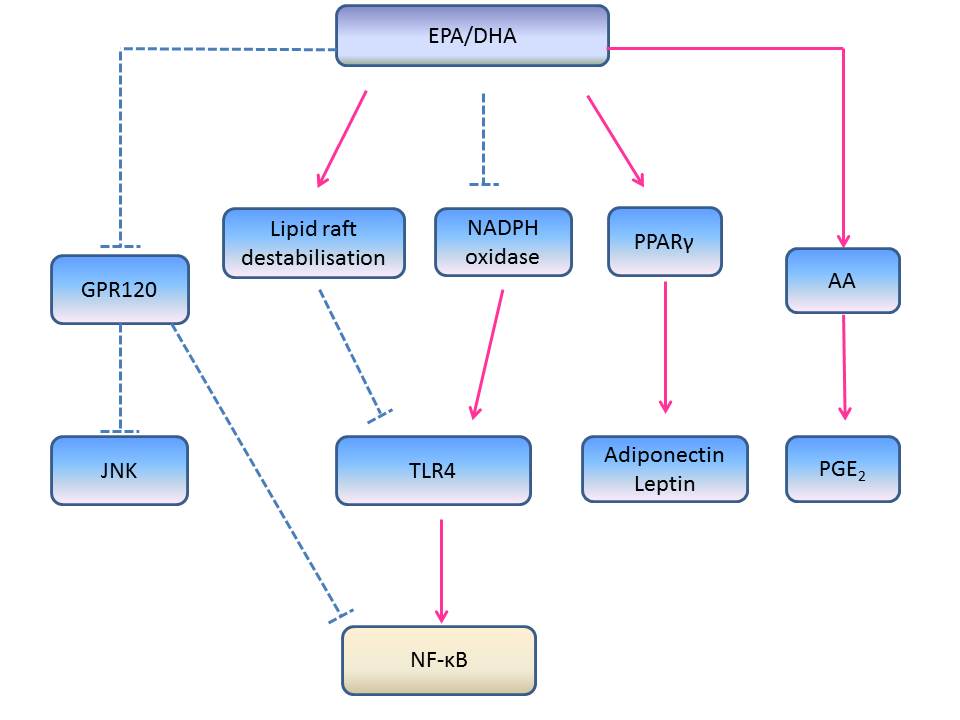

Supplement: MOESM3 [file 25653972]
